# Supplementary material
Source: Research Square preprint supplement (doi:10.21203/rs.3.rs-9641756/v1)
Supplement: Supplementary file 1 [file a6b40f3c72bab3f74280fc81.docx]

**Supplementary Information**

# Mapping Current and Future Schistosomiasis Risk in Rwanda under Climate Change

**Marcellin Rwibutso1,2,*, Chester Kalinda4,6,Zadoki Tabo2,3 , ImmaculateTumwebaze1, and Christian Albrecht1,2,5**

1 Department of Animal Ecology and Systematics, Justus Liebig University Giessen, Germany, Heinrich-Buff-Ring 26 (iFZ), 35392 Giessen, Germany

2 Center for International Development and Environmental Research (ZEU), Justus Liebig University Giessen, Senckenbergstrasse 3, 35390 Giessen, Germany

3Department of Landscape Ecology and Resource Management, Justus Liebig University Giessen, Heinrich-Buff-Ring 26 (iFZ), 35392 Giessen, Germany

4 School of Global Health, University of Global Health Equity (UGHE), Kigali, Rwanda

5 Department of Biology, Mbarara University of Science and Technology, Uganda, P.O. Box 1410, Mbarara, Uganda

6 Discipline of Public Health, School of Medicine, College of Health Sciences, University of KwaZulu-Natal, Durban 4041, South Africa.

***Correspondence**: [rwibutso87@gmail.com](mailto:rwibutso87@gmail.com)

E-mail addresses:

MR: [rwibutso87@gmail.com](mailto:rwibutso87@gmail.com)

**Fig. S1:** Raster layers considered for model input variable selection. Each raster was visually inspected to ensure complete spatial coverage and the absence of data gaps (NoData areas) within the study area. Only continuous layers without missing values were retained to prevent bias and misleading results in the modeling process.

**Fig. S2:** Pearson correlation matrix (lower triangle) of the environmental predictor variables used in the modeling process. Color intensity indicates the strength and direction of pairwise correlations, ranging from strong negative (blue, −1) to strong positive (red, +1). The matrix was used to identify multicollinearity among variables and to support the selection of non-redundant predictors for model development.

**Fig. S3:** Projected change in habitat suitability (Δ suitability) relative to current conditions for *Bulinus* (S3a–S3b) and *Biomphalaria* (S3c–S3d) under future climate scenarios SSP1-2.6 and SSP5-8.5. Positive values (green) indicate areas with increasing suitability, while negative values (blue) indicate decreasing suitability compared to the present baseline. Maps show spatial patterns of suitability shifts across the study area under moderate (SSP1-2.6) and high-emission (SSP5-8.5) scenarios.

**Fig. S4. Projected district-level changes in habitat suitability (Δ suitability) relative to present conditions (baseline) for *Bulinus* (upper panels) and *Biomphalaria* (lower panels) under moderate (SSP1–2.6) and high-emission (SSP5–8.5) climate scenarios for 2050. Positive changes (red) represent increased suitability, while negative changes (blue) indicate reduced suitability. The maps reveal species-specific and spatially heterogeneous responses to climate change across districts.**

Fig. S1:





Fig. S2:


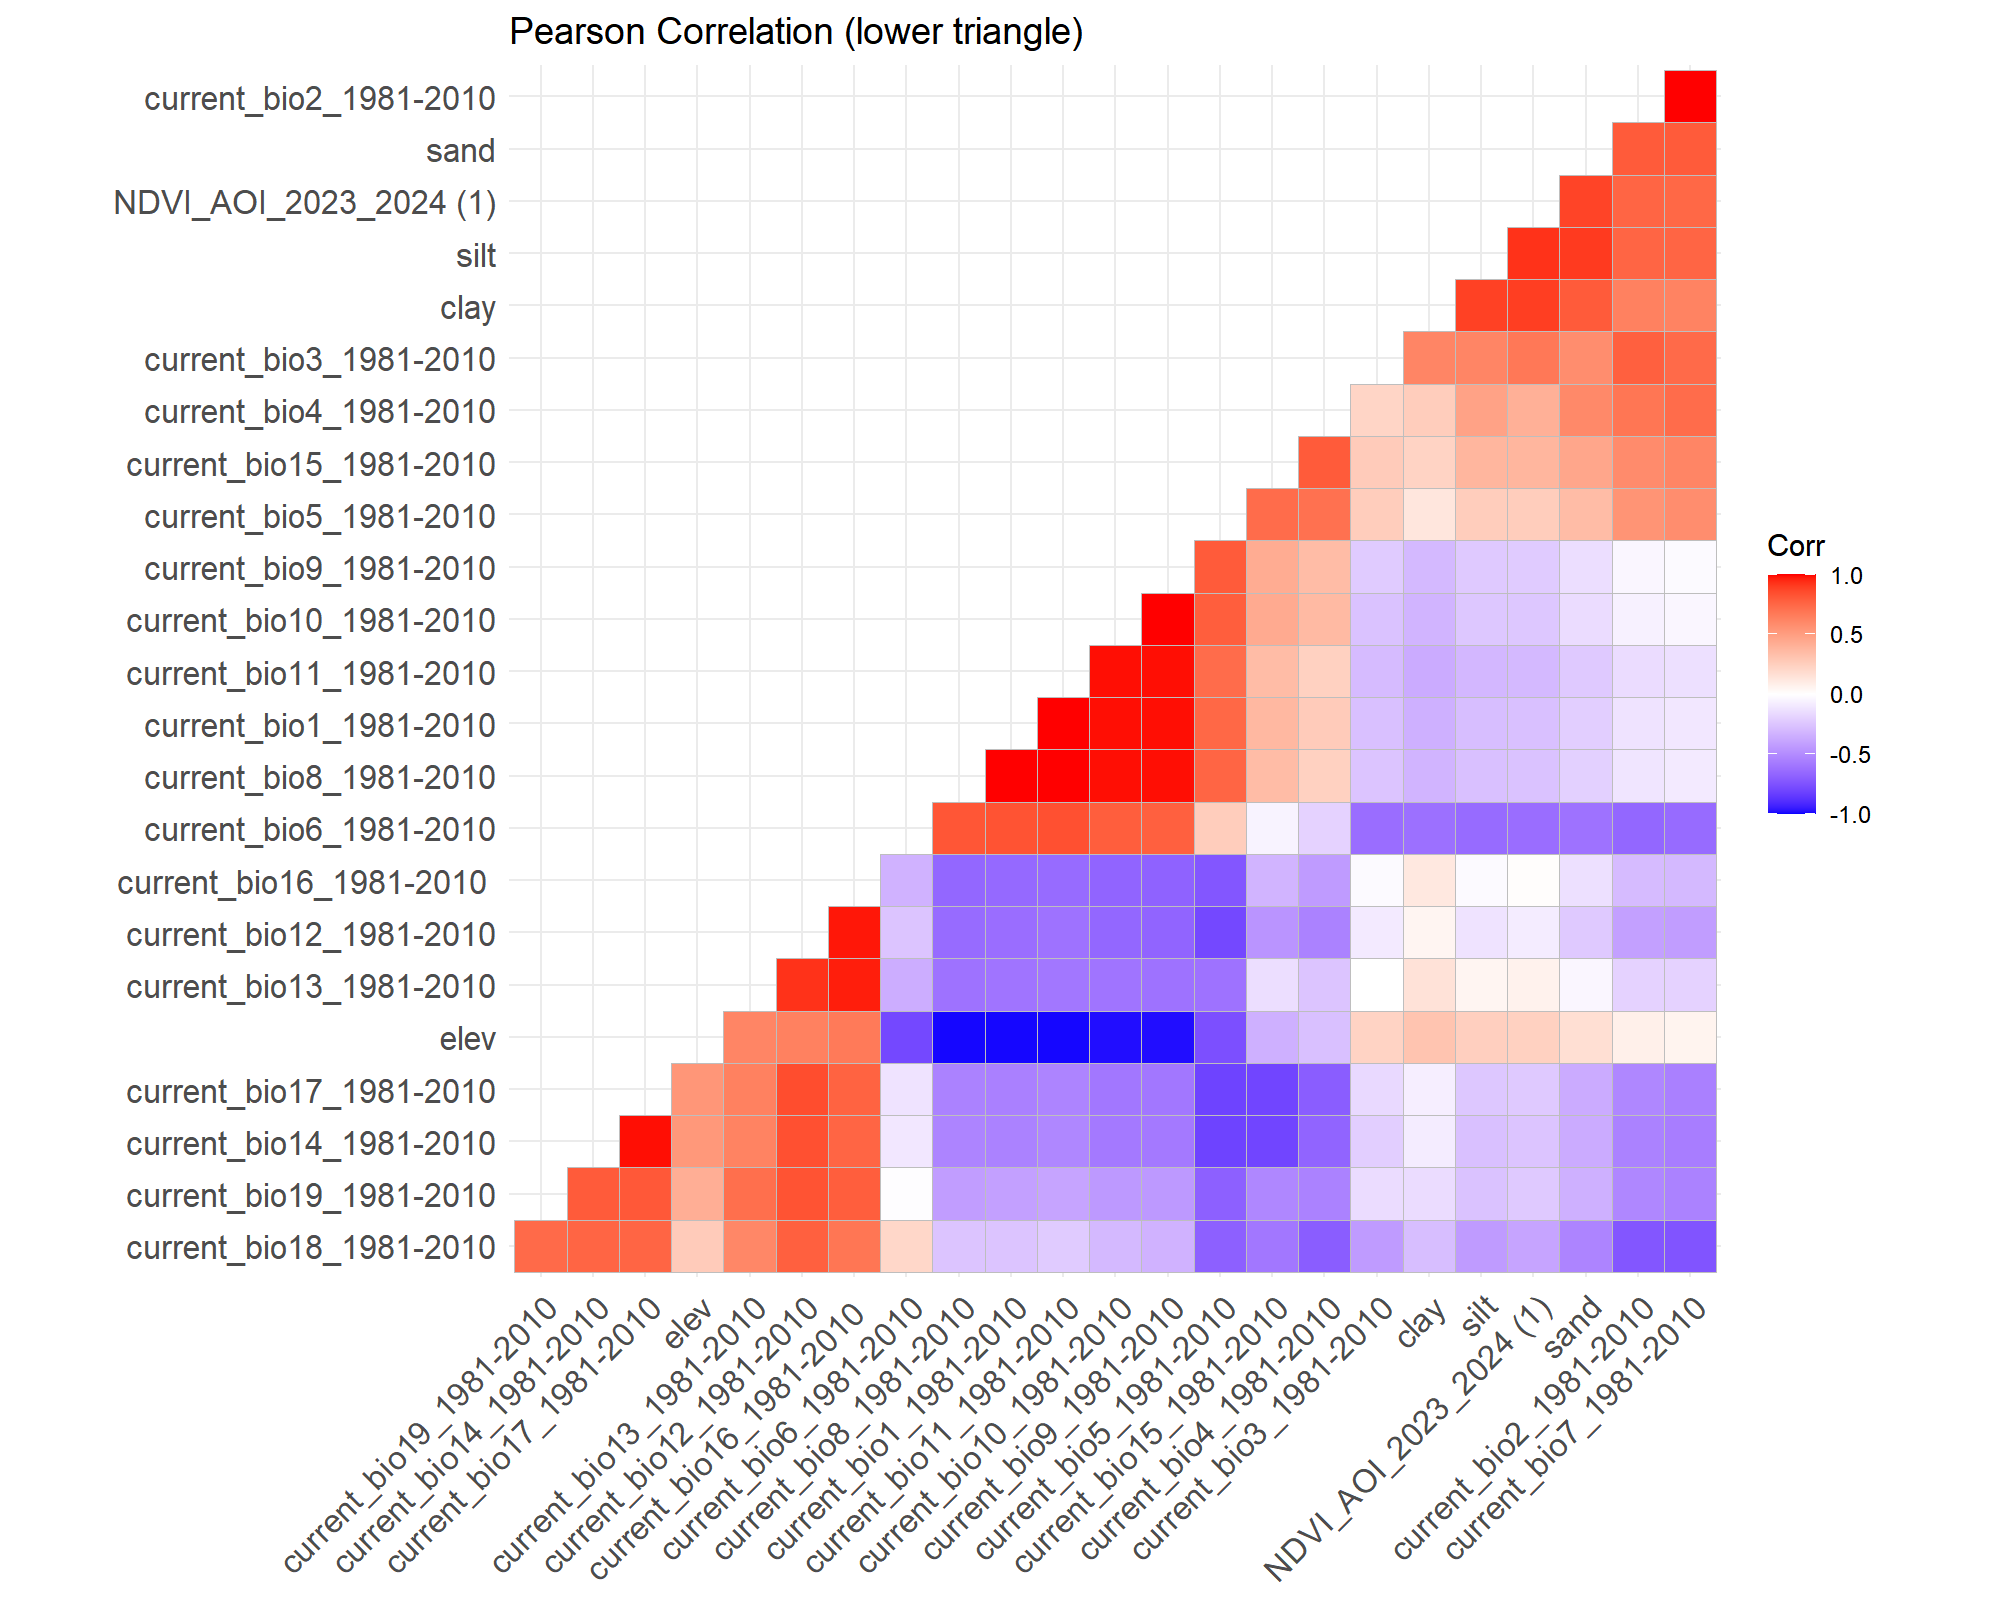


**Fig. S3:**


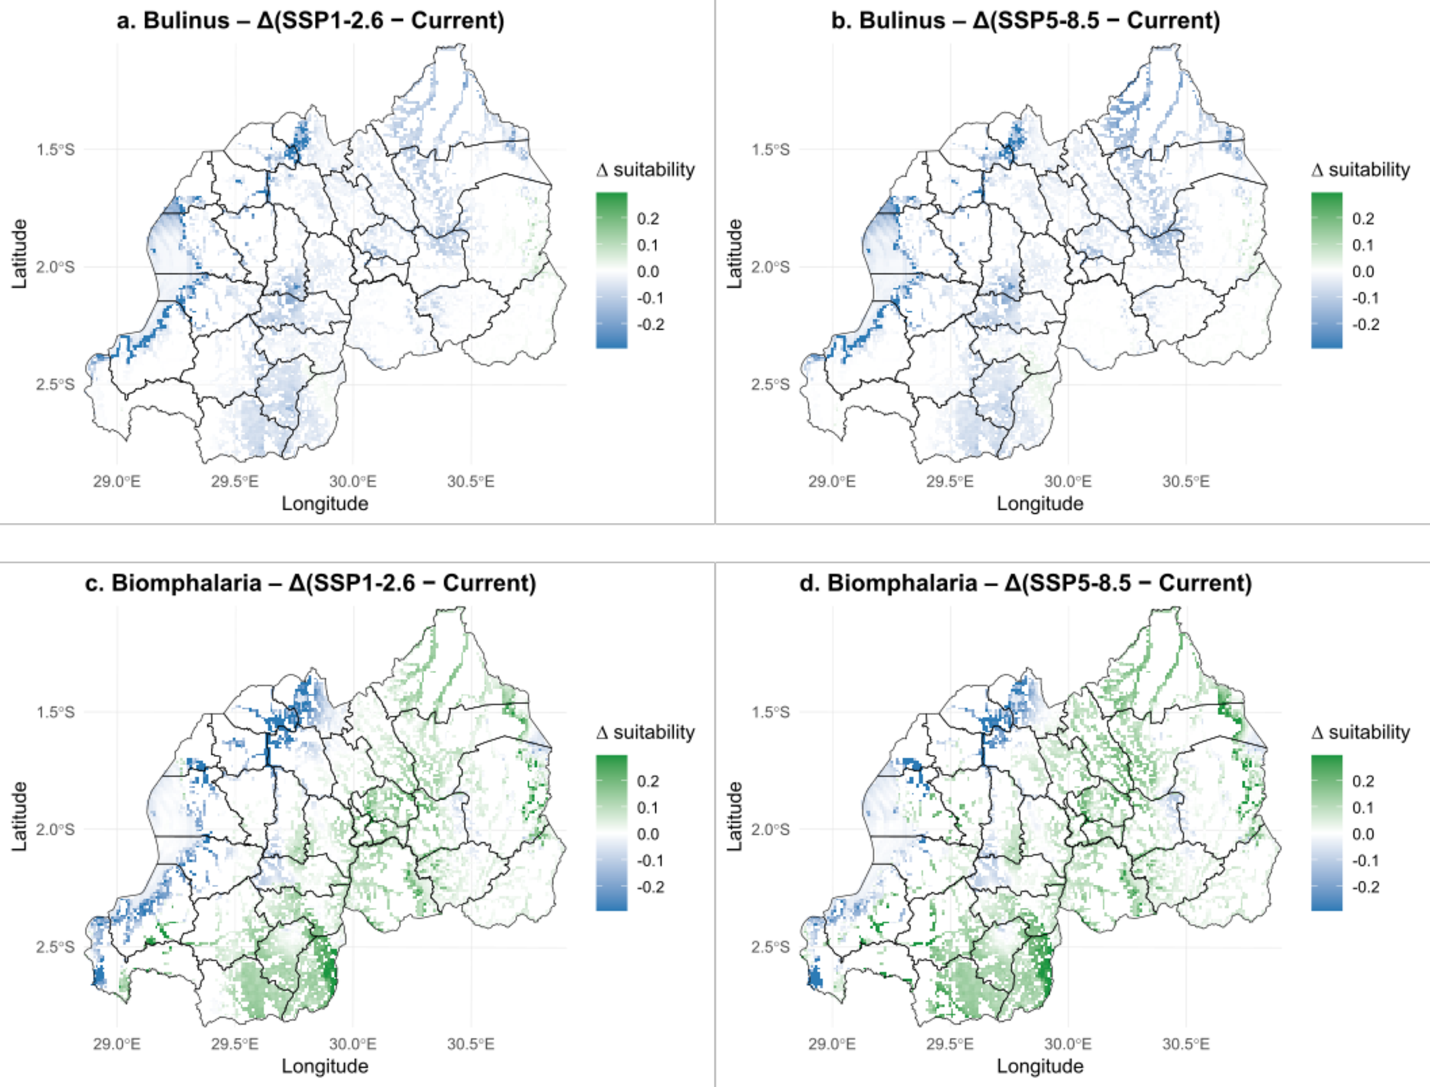


**Fig. S4:**





**Table S1: District-level sampling locations and geographic coordinates of *Biomphalaria* snail occurrences**

| **District** | **Location(waterbodies)** | **Species** | **Latitude** | **Longitude** | **Ref** |
| --- | --- | --- | --- | --- | --- |
| Rutsiro | Pfunda River | *Biomphalaria pfeifferi* | -1.82026 | 29.35886 | [1] |
| Rubavu | Sebeya River | *Biomphalaria pfeifferi* | -1.70939 | 29.30865 | [1] |
| Rubavu | Nyaburaro River | *Biomphalaria pfeifferi* | -1.74616 | 29.34263 | [1] |
| Rutsiro | Kazibaziba River | *Biomphalaria pfeifferi* | -2.02014 | 29.39096 | [1] |
| Rutsiro | Ntaruko River | *Biomphalaria pfeifferi* | -2.03045 | 29.39901 | [1] |
| Karongi | Gisayo River | *Biomphalaria pfeifferi* | -2.072 | 29.34411 | [1] |
| Rusizi | Cyunyu River | *Biomphalaria pfeifferi* | -2.47425 | 28.92357 | [1] |
| Rusizi | Kannyogo River | *Biomphalaria pfeifferi* | -2.44683 | 28.96992 | [1] |
| Rusizi | Kadasomwa River | *Biomphalaria pfeifferi* | -2.48265 | 28.90944 | [1] |
| Nyamasheke | Mutongo River | *Biomphalaria pfeifferi* | -2.28011 | 29.1955 | [1] |
| Nyagatare | Rice plantation (Muvumba) | *Biomphalaria* sp | -1.28675 | 30.31707 | [2] |
| Gisenyi | Lake Kivu | *Biomphalaria* sp | -1.69798 | 29.24905 | [1] |
| Rwamagana | Rice plantation (Rugende) | *Biomphalaria* sp | -1.89305 | 30.28889 | [2] |
| Rustiro | Lake Kivu | *Biomphalaria choanomphala* | -1.81336 | 29.2795 | [1] |
| Rusizi | Lake Kivu | *Biomphalaria choanomphala* | -2.47922 | 28.89847 | [1] |
| Rusizi | Lake Kivu | *Biomphalaria choanomphala* | -2.48322 | 28.89428 | [1] |
| Nyamasheke | Lake Kivu | *Biomphalaria choanomphala* | -2.31239 | 29.13775 | [1] |
| Nyamasheke | Lake Kivu | *Biomphalaria choanomphala* | -2.18839 | 29.28014 | [1] |
| Karongi | Lake Kivu | *Biomphalaria choanomphala* | -2.07361 | 29.35914 | [1] |
| Rubavu | Lake Kivu | *Biomphalaria choanomphala* | -1.73939 | 29.27028 | [1] |
| Rubavu | Lake Kivu | *Biomphalaria choanomphala* | -1.74814 | 29.27814 | [1] |
| Nyagatare | Rice plantation (Muvumba) | *Biomphalaria* sp | -1.38439 | 30.28913 | [2] |
| Burera | Rugezi wetland | *Biomphalaria* sp | -1.42026 | 29.8541 | [2] |
| Gatsibo | Rice plantation (Kanyonyomba) | *Biomphalaria* sp | -1.82562 | 30.3614 | [2] |
| Rwamagana | Lake Mugesera | *Biomphalaria* sp | -2.07692 | 30.32536 | [2] |
| Muhanga | Rice plantation (Muhanga ) | *Biomphalaria* sp | -2.11456 | 29.74404 | [2] |
| Burera | Rugezi wetland | *Biomphalaria* sp | -1.4162 | 29.8458 | [2] |
| Musanze | Lake Ruhondo | *Biomphalaria* sp | -1.49939 | 29.71595 | [2] |
| Nyagatare | Rice plantation (Muvumba) | *Biomphalaria* sp | -1.40864 | 30.27797 | [2] |
| Burera | Lake Ruhondo | *Biomphalaria* sp | -1.47449 | 29.7476 | Unpublished |
| Burera | Rugezi wetland | *Biomphalaria* sp | -1.41923 | 29.83568 | Unpublished |
| Gasabo | Lake Muhazi | *Biomphalaria* sp | -1.80503 | 30.17921 | Unpublished |
| Nyagatare | Rice plantation (Muvumba) | *Biomphalaria* sp | -1.28734 | 30.31817 | Unpublished |
| Gatsibo | Lake Muhazi | *Biomphalaria* sp | -1.85029 | 30.32547 | Unpublished |
| Gicumbi | Lake Muhazi | *Biomphalaria* sp | -1.79313 | 30.14771 | Unpublished |
| Gicumbi | Lake Muhazi | *Biomphalaria* sp | -1.84219 | 30.22835 | Unpublished |
| Musanze | Lake Ruhondo | *Biomphalaria* sp | -1.51485 | 29.72231 | Unpublished |
| Musanze | Lake Ruhondo | *Biomphalaria* sp | -1.51601 | 29.71621 | Unpublished |
| Musanze | Lake Ruhondo | *Biomphalaria* sp | -1.50192 | 29.74947 | Unpublished |
| Musanze | Lake Ruhondo | *Biomphalaria* sp | -1.502 | 29.74469 | Unpublished |
| Musanze | Lake Ruhondo | *Biomphalaria* sp | -1.53555 | 29.75498 | Unpublished |
| Musanze | Lake Ruhondo | *Biomphalaria* sp | -1.49978 | 29.71656 | Unpublished |
| Rutsiro | Kazibaziba River | *Biomphalaria* sp | -2.02009 | 29.39016 | Unpublished |
| Huye | Rice plantation (Gahenerezo) | *Biomphalaria* sp | -2.58196 | 29.73768 | Unpublished |
| Huye | Rice plantation (Rwasave) | *Biomphalaria* sp | -2.61113 | 29.76546 | Unpublished |
| Huye | Rice plantation (Rwasave) | *Biomphalaria* sp | -2.57567 | 29.75987 | Unpublished |
| Ngoma | Lake Mugesera | *Biomphalaria* sp | -2.15454 | 30.32722 | Unpublished |
| Ngoma | Lake Mugesera | *Biomphalaria* sp | -2.16252 | 30.33853 | Unpublished |
| Ngoma | Lake Mugesera | *Biomphalaria* sp | -2.20059 | 30.38493 | Unpublished |
| Ngoma | Lake Sake | *Biomphalaria* sp | -2.25367 | 30.37859 | Unpublished |
| Kayonza | Lake Muhazi | *Biomphalaria* sp | -1.83737 | 30.47504 | Unpublished |
| Rusizi | Rice plantation (Butambamo) | *Biomphalaria* sp | -2.64273 | 28.9497 | [3] |
| Rusizi | Lake Kivu | *Biomphalaria* sp | -2.40989 | 28.9015 | [3] |
| Rusizi | Lake Kivu | *Biomphalaria* sp | -2.40631 | 28.9056 | [3] |
| Nyamasheke | Rice plantation (Rwamatamu) | *Biomphalaria* sp | -2.21453 | 29.219 | [3] |
| Nyamasheke | Rice plantation(Kagano) | *Biomphalaria* sp | -2.34211 | 29.1185 | [3] |
| Nyamasheke | Lake Kivu | *Biomphalaria* sp | -2.27604 | 29.192 | [3] |
| Nyamasheke | Rice plantation (Gatare) | *Biomphalaria* sp | -2.27744 | 29.2 | [3] |
| Nyagatare | Rice plantation (Muvumba) | *Biomphalaria* sp | -1.43325 | 30.2601 | [3] |
| Nyagatare | Rice plantation (Muvumba) | *Biomphalaria* sp | -1.33299 | 30.2965 | [3] |
| Nyagatare | Rice plantation (Muvumba) | *Biomphalaria* sp | -1.34818 | 30.2932 | [3] |
| Nyagatare | Rice plantation (Muvumba) | *Biomphalaria* sp | -1.39505 | 30.2176 | [3] |
| Nyagatare | Rice plantation (Muvumba) | *Biomphalaria* sp | -1.40318 | 30.2764 | [3] |
| Nyagatare | Rice plantation (Muvumba) | *Biomphalaria* sp | -1.43610 | 30.3078 | [3] |
| Nyagatare | Rice plantation (Muvumba) | *Biomphalaria* sp | -1.43924 | 30.3081 | [3] |
| Gatsibo | Rice plantation (Muvumba) | *Biomphalaria* sp | -1.82559 | 30.3614 | [3] |
| Gatsibo | Rice plantation (Muvumba) | *Biomphalaria* sp | -1.80749 | 30.3725 | [3] |
| Gatsibo | Rice plantation (Muvumba) | *Biomphalaria* sp | -1.80670 | 30.3754 | [3] |
| Gatsibo | Rice plantation (Muvumba) | *Biomphalaria* sp | -1.81040 | 30.3753 | [3] |
| Kayonza | Rwabigabiro wetland | *Biomphalaria* sp | -1.83349 | 30.4924 | [3] |
| Kayonza | Rwabigabiro wetland | *Biomphalaria* sp | -1.83511 | 30.485 | [3] |
| Ngoma | Lake Sake | *Biomphalaria* sp | -2.25910 | 30.4017 | [3] |
| Rwamagana | Lake Muhazi | *Biomphalaria* sp | -1.85929 | 30.4303 | [3] |
| Rwamagana | Lake Muhazi | *Biomphalaria* sp | -1.87856 | 30.4339 | [3] |
| Bugesera | Lake Cyohoha | *Biomphalaria* sp | -2.35130 | 30.0427 | [3] |
| Bugesera | Lake Cyohoha | *Biomphalaria* sp | -2.34895 | 30.0434 | [3] |
| Nyanza | Rice plantation (Ntyazo) | *Biomphalaria* sp | -2.42214 | 29.8693 | [3] |
| Nyanza | Rice plantation (Nyanza) | *Biomphalaria* sp | -2.39889 | 29.7203 | [3] |
| Gasabo | Rice plantation (Kigali) | *Biomphalaria* sp | -1.90404 | 30.1054 | [3] |
| Gicumbi | Lake Muhazi | *Biomphalaria* sp | -1.79618 | 30.1738 | [3] |
| Gicumbi | Giti wetland | *Biomphalaria* sp | -1.77732 | 30.1376 | [3] |

**Table S2: Spatial distribution and specimen details of *Bulinus* species**

| **District** | **Location** | **Species** | **Latitude** | **Longitude** | **Prep No** | **Ref** |
| --- | --- | --- | --- | --- | --- | --- |
| Rwamagana | Lake Muhazi | *Bulinus truncatus* | -1.85912 | 30.49039 | 22513 | [4] |
| Rwamagana | Lake Muhazi | *Bulinus truncatus* | -1.84843 | 30.47826 | 22549 | [4] |
| Karongi | Kavungu River | *Bulinus forskalii* | -2.06699 | 29.41105 | 28720 | [1] |
| Rubavu | Lake Kivu | *Bulinus truncatus* | -1.69798 | 29.24905 |  | unpublished |
| Rwamagana | Rice plantation (Rugende) | *Bulinus trancatus* | -1.89305 | 30.28889 |  | [2] |
| Rutsiro | Lake Kivu | *Bulinus truncatus* | -1.813 | 29.27903 |  | unpublished |
| Rutsiro | Lake Kivu | *Bulinus truncatus* | -1.81336 | 29.2795 |  | [1] |
| Rusizi | Lake Kivu | *Bulinus truncatus* | -2.47922 | 28.89847 | 28932 | [1] |
| Nyamasheke | Lake Kivu | *Bulinus truncatus* | -2.31239 | 29.13775 | 28937 | [1] |
| Nyamasheke | Lake Kivu | *Bulinus truncatus* | -2.18839 | 29.28014 |  | [1] |
| Karongi | Lake Kivu | *Bulinus truncatus* | -2.07361 | 29.35914 | 28944 | [1] |
| Rusizi | Lake Kivu | *Bulinus truncatus* | -2.48436 | 28.89408 |  | [1] |
| Rubavu | Lake Kivu | *Bulinus truncatus* | -1.73939 | 29.27028 | 28946 | [1] |
| Rubavu | Lake Kivu | *Bulinus truncatus* | -1.73847 | 29.27542 | 28904 | [1] |
| Nyagatare | Akagera River | *Bulinus forskalii* | -1.06659 | 30.45412 | 29123 | Unpublished |
| Nyagatare | Rice plantation (Muvumba) | *Bulinus tropicus* | -1.3244 | 30.29866 | 29245 | Unpublished |
| Muhanga | Muhanga Dam | *Bulinus truncatus* | -2.10692 | 29.75244 | 29249 | Unpublished |
| Muhanga | Rice plantation (Muhanga) | *Bulinus tropicus* | -2.11456 | 29.74404 | 29253 | Unpublished |
| Musanze | Lake Ruhondo | *Bulinus truncatus* | -1.49939 | 29.71595 |  | Unpublished |
| Gasabo | Lake Muhazi | *Bulinus truncatus* | -1.80503 | 30.17921 | 29257 | Unpublished |
| Musanze | Lake Ruhondo | *Bulinus truncatus* | -1.51485 | 29.72231 | 29982 | Unpublished |
| Musanze | Lake Ruhondo | *Bulinus truncatus* | -1.53555 | 29.75498 |  | Unpublished |
| Burera | Lake Ruhondo | *Bulinus tropicus* | -1.48021 | 29.73865 | 29145 | Unpublished |
| Nyabihu | Karago wetland | *Bulinus truncatus* | -1.7 | 29.5 |  | Unpublished |
| Musanze | Lake Ruhondo | *Bulinus truncatus* | -1.502 | 29.74469 | 29986 | Unpublished |
| Huye | Rice plantation (Gahenerezo) | *Bulinus truncatus* | -2.58196 | 29.73768 |  | Unpublished |
| Huye | Rice plantation (Rwasave) | *Bulinus truncatus* | -2.61113 | 29.76546 | 30021 | Unpublished |
| Ngoma | Lake Mugesera | *Bulinus ugandae* | -2.20059 | 30.38493 | 30022 | Unpublished |
| Nyagatare | Kazaza Dam | *Bulinus truncatus* | -1.20139 | 30.3315 | 30016 | Unpublished |
| Nyagatare | Cyenjojo Dam | *Bulinus forskalii* | -1.25672 | 30.32676 | 30025 | Unpublished |
| Musanze | Lake Ruhondo | *Bulinus truncatus* | -1.50192 | 29.74947 | 29983 | Unpublished |
| Burera | Lake Burera | *Bulinus tropicus* | -1.38611 | 29.79686 | 29150 | Unpublished |

References

1. Dusabe MC, Kalinda C, Clewing C, Hyangya BL, Van Bocxlaer B, Albrecht C. Environmental perturbations and anthropogenic disturbances determine mollusc biodiversity of Africa’s explosive Lake Kivu. J Great Lakes Res. 2024;50: 102339. doi:10.1016/j.jglr.2024.102339

2. Rwibutso M, Clewing C, Habimana R, Kalinda C, Dusabe MC, Albrecht C. Molecular identification of *Radix natalensis* as the prevailing fasciolosis vector in Rwanda. Malacologia. 2025;68: 63–80.

3. Kagabo J, Tabo Z, Kalinda C, Nyandwi E, Rujeni N. Schistosomiasis transmission: A machine learning analysis reveals the importance of agrochemicals on snail abundance in Rwanda. PLoS Negl Trop Dis. 2024;18: e0012730. doi:10.1371/journal.pntd.0012730

4. Tumwebaze I, Clewing C, Dusabe MC, Tumusiime J, Kagoro-Rugunda G, Hammoud C, et al. Molecular identification of *Bulinus* spp. intermediate host snails of Schistosoma spp. In crater lakes of western Uganda with implications for the transmission of the Schistosoma haematobium group parasites. Parasites and Vectors. 2019;12: 1–23. doi:10.1186/s13071-019-3811-2
